# Supplementary material
Source: publisher figshare collection journal article supplement (https://acs.figshare.com/ndownloader/files/10108590)
Supplement: Supplementary file 1 [file 10108590]

## Supporting information (SI)

### **A case study application of the Aggregate Exposure Pathway (AEP) and Adverse Outcome Pathway (AOP) frameworks to facilitate the integration of human health and ecological endpoints for Cumulative Risk Assessment (CRA)**

David E. Hines<sup>1</sup>, Stephen W. Edwards<sup>1</sup>, Rory B. Conolly\*<sup>1</sup>, and Annie M. Jarabek<sup>2</sup>

<sup>1</sup>U.S. Environmental Protection Agency  
Office of Research and Development  
National Health and Environmental Effects Research Laboratory  
Research Triangle Park, NC 27709

<sup>2</sup>U.S. Environmental Protection Agency  
Office of Research and Development  
National Center for Environmental Assessment  
Research Triangle Park, NC 27709

#### **\*Corresponding Author:**

Rory B. Conolly, PhD  
U.S. Environmental Protection Agency  
109 T.W. Alexander Drive  
Research Triangle Park, NC 27709  
Mail code: B105-3  
Phone: 919-541-3350  
Email: [Conolly.Rory@epa.gov](mailto:Conolly.Rory@epa.gov)

**Pages:** 3

**Tables:** 1

**Figures:** 1

The information presented here documents the endpoints that correspond to different key events in the AOP network for the case study of the perchlorate anion presented in this work (Table SI1; page S2). Additionally, this document provides a figure and legend that highlights the relative observed activation dose of perchlorate reported for key event in vertebrate species (Figure SI1; page S3).

**Table SI1:** The measurement endpoints for dose-response data that are aggregated into nine KEs of the AOP network. Species with data included in this study for at least one of the endpoints at each KE are shown in the Empirical Data column. Abbreviations: adverse outcome (AOs), key events (KEs), lethal concentration 50%, (LC50), molecular initiating event (MIE), sodium-iodide symporter (NIS), triiodothyronine (T3), thyroxine (T4), thyroid hormone (TH), thyroid stimulating hormone (TSH).

| Position            | KE                              | Endpoints                                                                                                                                 | Empirical Data                                                                      |
|---------------------|---------------------------------|-------------------------------------------------------------------------------------------------------------------------------------------|-------------------------------------------------------------------------------------|
| MIE                 | NIS inhibition                  | NIS inhibition                                                                                                                            | Human<br>Rat                                                                        |
| Intermediate<br>KEs | TH depletion in thyroid         | T4 decrease (thyroid tissue)<br>Colloid depletion                                                                                         | Rat<br>Vole<br>Quail<br>Rabbit<br>Zebrafish<br>Mosquito fish<br>African clawed frog |
|                     | TH decrease in serum            | T4 decrease (plasma)<br>T3 decrease (plasma)<br>T4 decrease (whole body)                                                                  | Rat<br>Vole<br>Quail<br>Rabbit<br>Zebrafish<br>Mosquito fish<br>African clawed frog |
|                     | TSH increase                    | TSH increase (whole body)<br>TSH gene upregulation                                                                                        | Rat<br>Zebrafish<br>African clawed frog                                             |
|                     | Other thyroid histology changes | Angiogenesis<br>Follicle cell height decrease<br>Hyperplasia<br>Hypertrophy<br>Total thyroid weight                                       | Rat<br>Vole<br>Quail<br>Rabbit<br>Zebrafish<br>Mosquito fish<br>African clawed frog |
| AOs                 | Impaired growth                 | Total body weight<br>Length<br>Condition factor<br>Limb size<br>Altered metamorphosis<br>Altered feeding                                  | Zebrafish<br>African clawed frog<br>Mosquito larvae<br>Sand Dollars<br>Water fleas  |
|                     | Decreased fecundity             | Decreased egg volume<br>Altered sex ratio<br>Altered pubertal development<br>Decreased cocoon production<br>Decreased reproductive output | Zebrafish<br>African clawed frog<br>Earthworms<br>Water fleas                       |
|                     | Developmental neurotoxicity     | Altered behavior<br>Altered larval development<br>Altered brain morphometry                                                               | Rat<br>Zebrafish<br>African clawed frog                                             |
|                     | Decreased survival              | LC50<br>Decreased survival                                                                                                                | Mosquito fish<br>Earthworms<br>Mosquito larvae                                      |

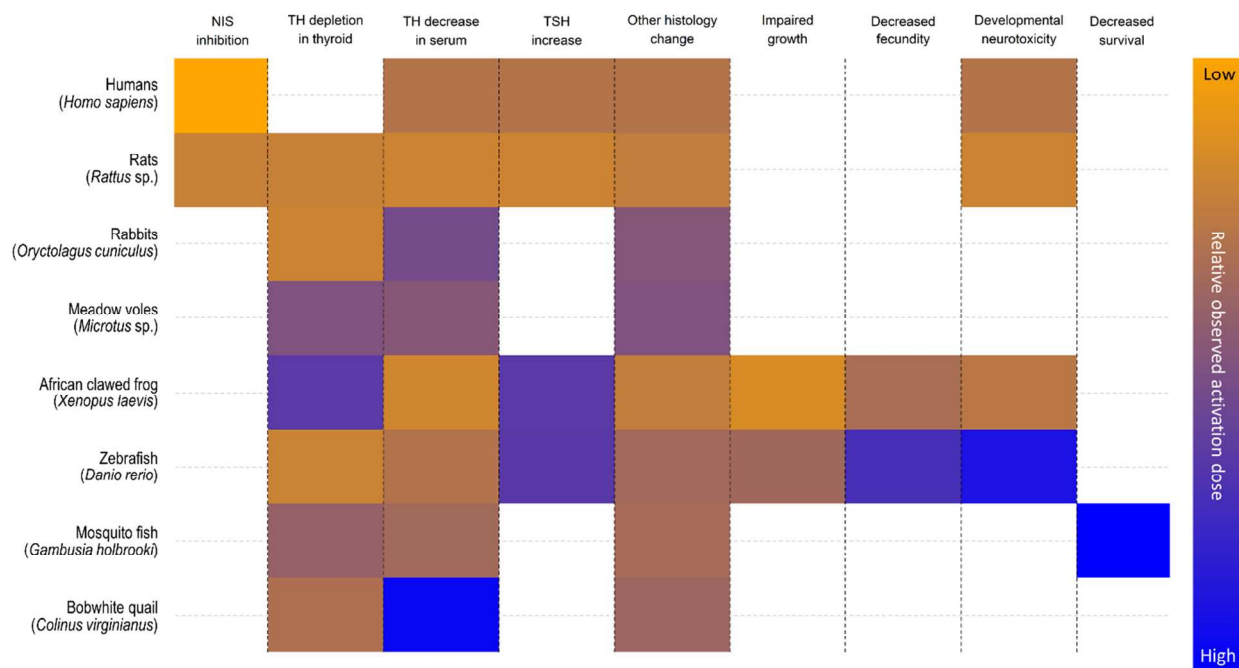

**Figure S11:** Heatmap showing the relative observed activation dose of different vertebrate species to each KE in the ClO<sub>4</sub><sup>-</sup> AOP network. Colors correspond to the lowest reported values to activate each KE, with orange indicating lower doses of ClO<sub>4</sub><sup>-</sup> necessary for activation. Blank spaces indicate data gaps for each species. Abbreviations: sodium-iodide symporter (NIS), thyroid hormone (TH), thyroid stimulating hormone (TSH).
